# Supplementary material for: Tuning thermal and graphitization behaviors of lignin via complexation with transition metal ions for the synthesis of multilayer graphene-based materials
Source: Royal Society of Chemistry journal article supplement (doi:10.1039/d3ra05881f), 2024-01-01
Supplement: d3ra05881f1.pdf [file d3ra05881f1.pdf]

## Supporting Information

### **Tuning Thermal and Graphitization Behaviors of Lignin via Complexation with Transition Metal Ions for the Synthesis of Multilayer Graphene-based Materials**

Qiang Yan <sup>a</sup>, Hanwen Zhang <sup>b</sup>, Timothy Ketelboeter <sup>a</sup>, Yucheng Peng <sup>c,\*</sup>, Caixia Wan <sup>b,\*</sup>, Zhiyong Cai <sup>a,\*</sup>

<sup>a</sup> Forest Products Lab, USDA Forest Service, One Gifford Pinchot Drive, Madison, WI 53726

<sup>b</sup> Department of Chemical and Biomedical Engineering, University of Missouri, 1406 East Rollins Street, Columbia, MO 65211

<sup>c</sup> College of Forestry, Wildlife and Environment, Auburn University, 602 Duncan Dr, Auburn, AL 36849

\* Corresponding authors. Tel: +1 334 844-1089, Email: [yzp0027@auburn.edu](mailto:yzp0027@auburn.edu) (Yucheng Peng); Tel: +1 573 884 7882, Email: [wanca@missouri.edu](mailto:wanca@missouri.edu) (Caixia Wan); Tel: 608-231-9446, Email: [zhiyong.cai@usda.gov](mailto:zhiyong.cai@usda.gov) (Zhiyong Cai).

Number of pages: 4

Number of figures: 3

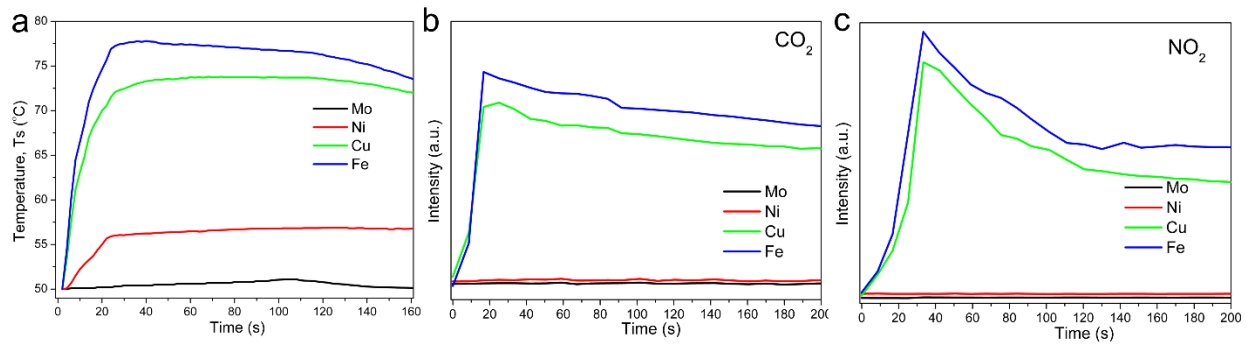

**Figure S1.** Temperature profiles and gaseous byproducts generated during the M-Lignin complex preparation processes.

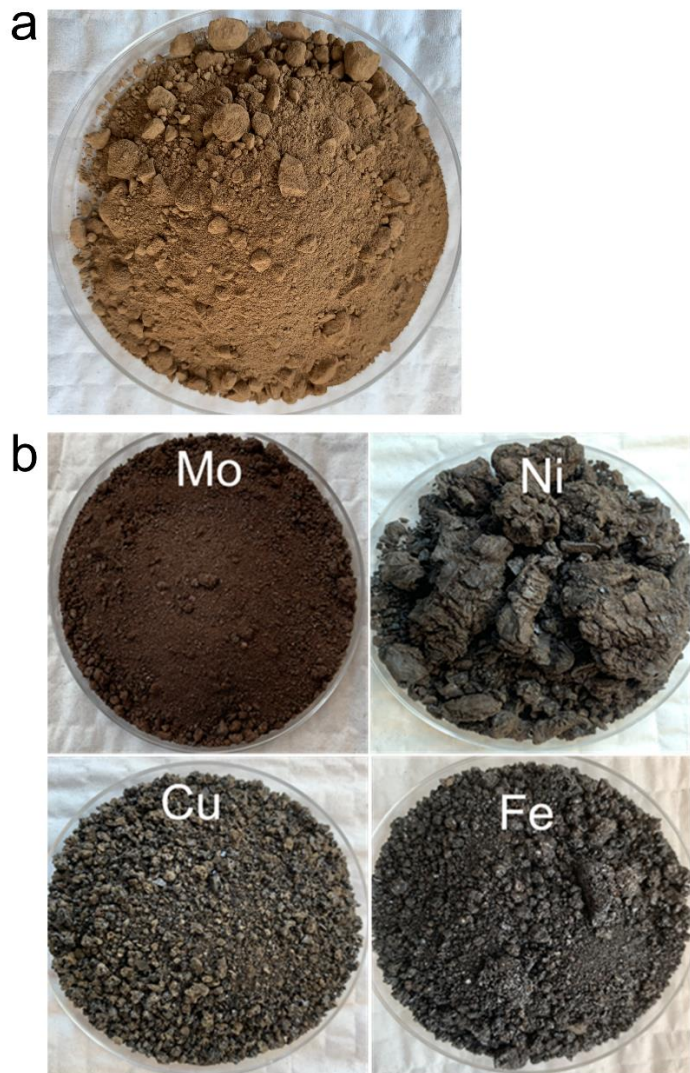

**Figure S2.** Photos of (a) kraft lignin and (b) M-Lignin complexes.

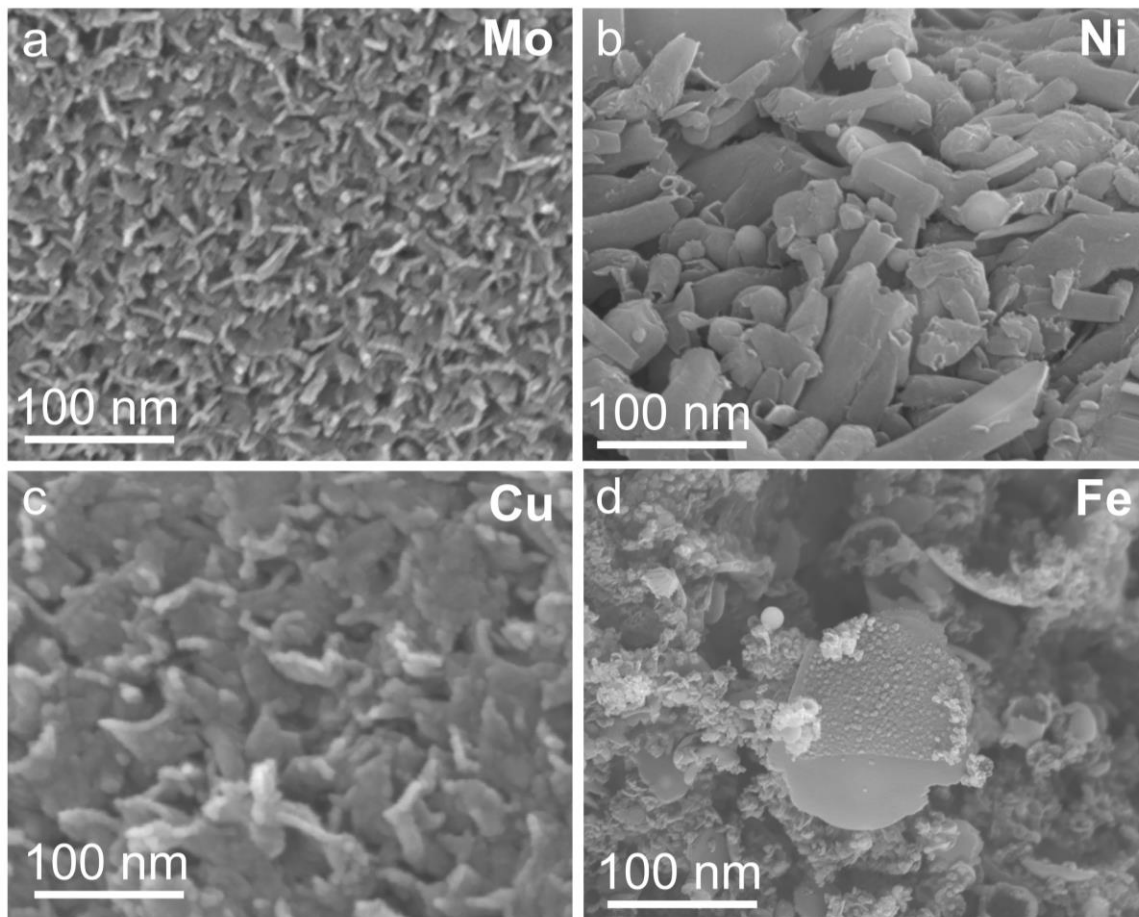

**Figure S3.** SEM images of microstructure of the products resulting from MCW.
